# Supplementary material for: Effective control of SARS-CoV-2 transmission between healthcare workers during a period of diminished community prevalence of COVID-19
Source: eLife. 2020 Jun 19;9:e59391. doi: 10.7554/eLife.59391 (PMC7326489; doi:10.7554/eLife.59391)
Supplement: Figure 1—source data 1. [file elife-59391-fig1-data1.xlsx]

## Sheet: Figures 1A 1B
Figures 1A - 1B Source Data
Week	Week commencing	Total tested	Total positive	Asymptomatics tested	Symptomatic tested	HHC tested	Unknown/ other tested	Asymptomatic positive	Symptomatic positive	HHC positive	Unknown/ other positive
1	2020-04-06	143	6	121	15	7	0	4	1	1	0
2	2020-04-13	463	37	383	60	18	2	20	14	3	0
3	2020-04-20	663	18	529	95	26	13	7	11	0	0
4	2020-04-27	731	18	550	119	62	0	11	7	0	0
5	2020-05-04	641	12	483	104	50	4	8	3	1	0
6	2020-05-11	954	1	738	164	51	1	1	0	0	0
7	2020-05-18	1062	3	840	168	53	1	1	2	0	0

## Sheet: Figures 1C 1D
Figures 1C - 1D Source Data
Week commencing	Positive patient tests in CUHNFT	Positive patient tests in EOE
2020-04-06	94	2292
2020-04-13	48	1840
2020-04-20	36	1842
2020-04-27	38	1482
2020-05-04	32	1000
2020-05-11	18	681
2020-05-18	6	417
